# Supplementary material for: Optimum contribution selection for conserved populations with historic migration
Source: PubMed Central journal article supplement (PMC3807754; doi:10.1186/1297-9686-44-34), 2012-11-15
Supplement: 1297-9686-44-34-S1.pdf [file 1297-9686-44-34-S1.pdf]

In the computations section, the matrices  $f_{P_t}$ ,  $f_{P_t}^M$ , and  $f_{P_t}^{FM}$  were defined for population  $P_t$ . More generally, let  $f_J$ ,  $f_J^M$ , and  $f_J^{FM}$  be the respective matrices for an arbitrary birth cohort  $J$ . Take  $X_{1i}$  to be the paternal and  $X_{2i}$  the maternal allele of individual  $i$ , and let  $X_i$  be an allele at the locus that is randomly chosen from the two alleles of individual  $i$ . Let  $s_i$  be the sire and  $d_i$  the dam of individual  $i$ .

### Equation

$$\text{condGD}(P_t) = \frac{\bar{f}_{P_t}^{FM} - \bar{f}_{P_t}^M}{C_{\mathcal{F}}(P_t) - \frac{1 - \bar{f}_{P_t}^{FM}}{2}}. \quad (1)$$

### Proof:

For individuals  $i, j$  we have

$$\begin{aligned} 1 - f_{ij}^{FM} &= P(X_i \not\equiv_{FM} X_j) \\ &= P((X_i \in \mathcal{M} \text{ or } X_j \in \mathcal{M}) \text{ and } (X_i \in \mathcal{F} \text{ or } X_j \in \mathcal{F})) \\ &= P(X_i \in \mathcal{F}, X_j \in \mathcal{M}) + P(X_i \in \mathcal{M}, X_j \in \mathcal{F}) \end{aligned}$$

and

$$\begin{aligned} 1 - f_{ij}^M &= P(X_i \not\equiv_M X_j) \\ &= P(X_i \neq X_j \text{ and } (X_i \in \mathcal{F} \text{ or } X_j \in \mathcal{F})) \\ &= P(X_i \neq X_j \text{ and } (X_i \in \mathcal{F} \text{ and } X_j \in \mathcal{F})) \\ &\quad + P(X_i \neq X_j \text{ and } (X_i \in \mathcal{F} \text{ and } X_j \in \mathcal{M})) \\ &\quad + P(X_i \neq X_j \text{ and } (X_i \in \mathcal{M} \text{ and } X_j \in \mathcal{F})) \\ &= P(X_i \neq X_j \text{ and } X_i \in \mathcal{F} \text{ and } X_j \in \mathcal{F}) \\ &\quad + P(X_i \in \mathcal{F}, X_j \in \mathcal{M}) + P(X_i \in \mathcal{M}, X_j \in \mathcal{F}). \end{aligned}$$

Thus, 
$$1 - \bar{f}_J^{FM} = P(X_J \in \mathcal{F}, Y_J \in \mathcal{M}) + P(X_J \in \mathcal{M}, Y_J \in \mathcal{F}) \quad (7)$$

$$= 2P(X_J \in \mathcal{F}, Y_J \in \mathcal{M})$$

and

$$\begin{aligned} 1 - \bar{f}_J^M &= P(X_J \in \mathcal{F}, Y_J \in \mathcal{M}) + P(X_J \in \mathcal{M}, Y_J \in \mathcal{F}) \\ &\quad + P(X_J \neq Y_J \text{ and } X_J \in \mathcal{F} \text{ and } Y_J \in \mathcal{F}) \\ &= 2P(X_J \in \mathcal{F}, Y_J \in \mathcal{M}) + P(X_J \neq Y_J \text{ and } X_J \in \mathcal{F} \text{ and } Y_J \in \mathcal{F}) \\ &= 1 - \bar{f}_J^{FM} + P(X_J \neq Y_J \text{ and } X_J \in \mathcal{F} \text{ and } Y_J \in \mathcal{F}). \end{aligned}$$

It follows that

$$\begin{aligned}
P(X_J \in \mathcal{F}, Y_J \in \mathcal{F}) \cdot \text{condGD}(J) &= P(X_J \neq Y_J \text{ and } X_J \in \mathcal{F} \text{ and } Y_J \in \mathcal{F})(8) \\
&= 1 - \bar{f}_J^M - (1 - \bar{f}_J^{FM}) \\
&= \bar{f}_J^{FM} - \bar{f}_J^M
\end{aligned}$$

and

$$\begin{aligned}
P(X_J \in \mathcal{F}, Y_J \in \mathcal{F}) &= P(X_J \in \mathcal{F}) - P(X_J \in \mathcal{F}, Y_J \in \mathcal{M}) \\
&= C_{\mathcal{F}}(J) - \frac{1 - \bar{f}_J^{FM}}{2}.
\end{aligned}$$

Thus,

$$\text{condGD}(J) = \frac{\bar{f}_J^{FM} - \bar{f}_J^M}{P(X_J \in \mathcal{F}, Y_J \in \mathcal{F})} = \frac{\bar{f}_J^{FM} - \bar{f}_J^M}{C_{\mathcal{F}}(J) - \frac{1 - \bar{f}_J^{FM}}{2}}.$$

The claim follows with  $J = P_t$ .

**Equation**

$$C_{\mathcal{F}}(O_t(c)) = C_{\mathcal{F}}(O_t^N(c)) = c^T C_t \tag{2}$$

**Proof:** We have

$$\begin{aligned}
C_{\mathcal{F}}(O_t^N(c)) &= P(X_{O_t^N(c)} \in \mathcal{F}) \\
&= \frac{1}{N} \sum_{i \in O_t^N(c)} P(X_i \in \mathcal{F}) \\
&= \frac{1}{N} \sum_{i \in O_t^N(c)} P(X_i = X_{1i})P(X_i \in \mathcal{F}|X_i = X_{1i}) + P(X_i = X_{2i})P(X_i \in \mathcal{F}|X_i = X_{2i}) \\
&= \frac{1}{N} \sum_{i \in O_t^N(c)} \frac{1}{2} (P(X_{1i} \in \mathcal{F}|X_i = X_{1i}) + P(X_{2i} \in \mathcal{F}|X_i = X_{2i})) \\
&= \frac{1}{N} \sum_{i \in O_t^N(c)} \frac{1}{2} (P(X_{1i} \in \mathcal{F}) + P(X_{2i} \in \mathcal{F})) \\
&= \frac{1}{2N} \sum_{i \in O_t^N(c)} P(X_{s_i} \in \mathcal{F}) + P(X_{d_i} \in \mathcal{F}) \\
&= \frac{1}{2N} \sum_{a \in P_t} \#\{i \in O_t^N(c) : s_i = a \text{ or } d_i = a\} P(X_a \in \mathcal{F}) \\
&= \sum_{a \in P_t} c_a P(X_a \in \mathcal{F}) \\
&= c^T C_t
\end{aligned}$$

**Equation**

$$\text{condGD}(O_t(c)) = \lim_{N \rightarrow \infty} \text{condGD}(O_t^N(c)) = \frac{c^T (f_{P_t}^{FM} - f_{P_t}^M) c}{c^T C_t - \frac{1 - c^T f_{P_t}^{FM} c}{2}} \quad (3)$$

**Proof:**

For brevity let  $J_N = O_t^N(c)$ . From the proof of Equation (1) we have:

$$\text{condGD}(J_N) = \frac{\bar{f}_{J_N}^{FM} - \bar{f}_{J_N}^M}{C_{\mathcal{F}}(J_N) - \frac{1 - \bar{f}_{J_N}^{FM}}{2}}$$

In analogy to Wellmann and Pfeiffer (2009) it can be shown that

$$\begin{aligned} \bar{f}_{J_N}^{FM} &= \frac{1}{(2N)^2} (\tilde{c}^T f_{P_t}^{FM} \tilde{c} + 2N - \tilde{c}^T \text{Diag}(f_{P_t}^{FM})) \\ \bar{f}_{J_N}^M &= \frac{1}{(2N)^2} (\tilde{c}^T f_{P_t}^M \tilde{c} + 2N - \tilde{c}^T \text{Diag}(f_{P_t}^M)), \end{aligned}$$

where  $\tilde{c} = 2Nc$ , and  $\text{Diag}(X)$  is the vector that contains the diagonal elements of matrix  $X$ . It follows that

$$\lim_{N \rightarrow \infty} \bar{f}_{J_N}^{FM} = c^T f_{P_t}^{FM} c \quad \text{and} \quad \lim_{N \rightarrow \infty} \bar{f}_{J_N}^M = c^T f_{P_t}^M c. \quad (9)$$

Thus,

$$\lim_{N \rightarrow \infty} \text{condGD}(J_N) = \frac{c^T f_{P_t}^{FM} c - c^T f_{P_t}^M c}{c^T C_t - \frac{1 - c^T f_{P_t}^{FM} c}{2}}.$$

**Equation**

$$\lim_{N \rightarrow \infty} \phi_B(O_t^N(c)) = c^T (f_{P_t}^{FM} - f_{P_t}^M) c \quad (4)$$

**Proof:**

For brevity let  $J_N = O_t^N(c)$ . We have

$$\begin{aligned} \lim_{N \rightarrow \infty} \phi_B(O_t^N(c)) &= \lim_{N \rightarrow \infty} P(X_{J_N} \neq Y_{J_N}, X_{J_N} \in \mathcal{F}, Y_{J_N} \in \mathcal{F}) \\ &= \lim_{N \rightarrow \infty} P(X_{J_N} \in \mathcal{F}, Y_{J_N} \in \mathcal{F}) \text{condGD}(J_N) \\ &\stackrel{(8)}{=} \lim_{N \rightarrow \infty} \bar{f}_{J_N}^{FM} - \bar{f}_{J_N}^M \\ &\stackrel{(9)}{=} c^T (f_{P_t}^{FM} - f_{P_t}^M) c \end{aligned}$$

**Equation**

$$\lim_{N \rightarrow \infty} \phi_C(O_t^N(c)) = 1 - c^T f_{P_t}^M c \quad (5)$$

**Proof:**

For brevity let  $J_N = O_t^N(c)$ . We have

$$\begin{aligned} \lim_{N \rightarrow \infty} \phi_C(O_t^N(c)) &= \lim_{N \rightarrow \infty} P(X_{J_N} \neq Y_{J_N} \text{ and } (X_{J_N} \in \mathcal{F} \text{ or } Y_{J_N} \in \mathcal{F})) \\ &= \lim_{N \rightarrow \infty} P(X_{J_N} \neq Y_{J_N}, X_{J_N} \in \mathcal{F}, Y_{J_N} \in \mathcal{F}) \\ &+ 2 \lim_{N \rightarrow \infty} P(X_{J_N} \neq Y_{J_N}, X_{J_N} \in \mathcal{F}, Y_{J_N} \in \mathcal{M}) \\ &= \lim_{N \rightarrow \infty} \phi_B(O_t^N(c)) \\ &+ 2 \lim_{N \rightarrow \infty} P(X_{J_N} \in \mathcal{F}, Y_{J_N} \in \mathcal{M}) P(X_{J_N} \neq Y_{J_N} | X_{J_N} \in \mathcal{F}, Y_{J_N} \in \mathcal{M}) \\ &= \lim_{N \rightarrow \infty} \phi_B(O_t^N(c)) + \lim_{N \rightarrow \infty} 2P(X_{J_N} \in \mathcal{F}, Y_{J_N} \in \mathcal{M}) \\ &\stackrel{(4),(7)}{=} c^T (f_{P_t}^{FM} - f_{P_t}^M) c + \lim_{N \rightarrow \infty} (1 - \bar{f}_J^{FM}) \\ &\stackrel{(9)}{=} 1 - c^T f_{P_t}^M c \end{aligned}$$

**Equation**

$$\lim_{N \rightarrow \infty} \phi_D(O_t^N(c)) = \frac{c^T (f_{P_t}^{FM} - f_{P_t}^M) c}{c^T Q_t c} \quad (6)$$

**Proof:**

From Equation 3 we have

$$\begin{aligned} \lim_{N \rightarrow \infty} \text{condGD}(J_N) &= \frac{c^T f_{P_t}^{FM} c - c^T f_{P_t}^M c}{c^T C_t - \frac{1 - c^T f_{P_t}^{FM} c}{2}} \\ &= \frac{c^T (f_{P_t}^{FM} - f_{P_t}^M) c}{\frac{c^T C_t \mathbf{1}^T c + c^T \mathbf{1} C_t^T c}{2} - \frac{c^T \mathbf{1} \mathbf{1}^T c - c^T f_{P_t}^{FM} c}{2}} \\ &= \frac{c^T (f_{P_t}^{FM} - f_{P_t}^M) c}{c^T \frac{1}{2} (C_t \mathbf{1}^T + \mathbf{1} C_t^T - \mathbf{1} \mathbf{1}^T + f_{P_t}^{FM}) c} \end{aligned}$$
